# Supplementary material
Source: ML conference proceedings conference paper supplement (https://openreview.net/forum?id=wnPlJNiqfA)
Supplement: supplementary_material [file attachment]

**All code is implemented on** **Ceka platform and the version of Ceka platform is 1.0.1**

KFNN.java is the code for the algorithm proposed in the paper, and Test_S.java and Test_R.java are the codes used to test the experiment on the simulated and real-world datasets, respectively. CekaUtils.java provides some functions used in the Test_S.java and Test_R.java. KFNN_noKF.java and KFNN_noLDE.java are the codes of two competitors in ablation experiments. Test_R_Ablation.java is the code for ablation experiments. Kalman.java is the code for Kalman filter designed by KFNN. Mdistance.java is the code for calculating the Mahalanobis distance.

1. **Implement the experiments on simulated datasets (modified in Test_S.java).**
2. Modify the dataSetArffDir to the path where your simulated datasets are stored.


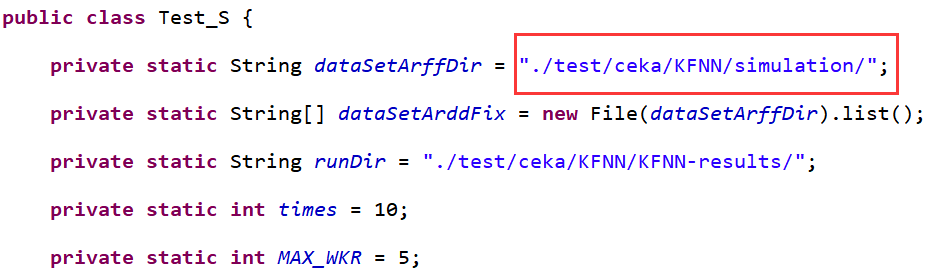


1. Modify the runDir to the path where your want to store the experiment results.


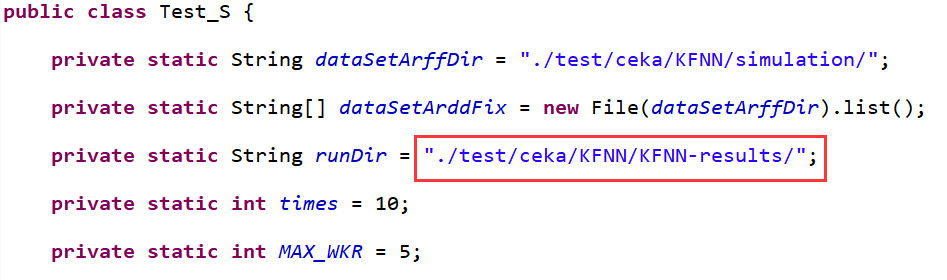


1. Run the code to get the results of the experiment.
2. **Implement the experiments on real-world datasets (modified in Test_R.java).**

The operations are almost identical to the ones on the simulation dataset, so we won't repeat them again here.

1. **Implement the ablation experiments on real-world datasets (modified in Test_R_Ablati- on.java).**

The operations are almost identical to the ones on the simulation dataset, so we won't repeat them again here.
